# Supplementary figures and images for: A novel poly-ε-lysine based implant, Proliferate®, for promotion of CNS repair following spinal cord injury
Source: Royal Society of Chemistry journal article supplement (doi:10.1039/d0bm00097c), 2020-01-01

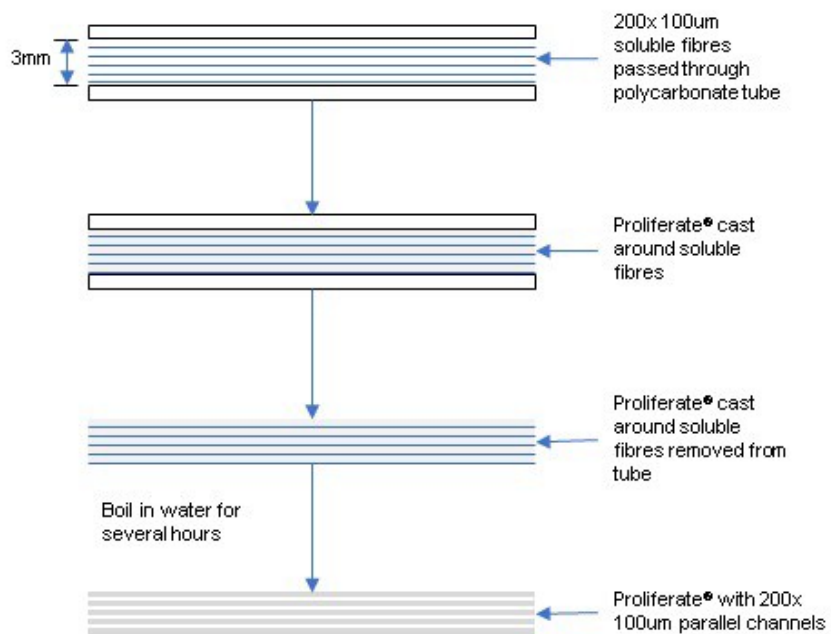

Supplement: d0bm00097c3.pdf [file d0bm00097c3.pdf]
